# Supplementary material
Source: publisher figshare collection journal article supplement (https://acs.figshare.com/ndownloader/files/26579802)
Supplement: Supplementary file 1 [file 26579802]

## Supporting Information

Rationally Constructing Nano MOF-derived Ni and CQDs Embedded N-doped Carbon Nanosphere for Hydrogenation of Petroleum Resin at Low Temperature

*Chenghong Wu, Xiaopeng Chen, Liqun Tang, Qiaolu Wei, Xiaojie Wei, Jiezhen Liang, Linlin Wang\**

School of Chemistry and Chemical Engineering, Guangxi Key Laboratory of Petrochemical Resource Processing and Process Intensification Technology, Guangxi University, Nanning 530004, PR China

Corresponding Author:

E-mail: wanglinlin1971@sina.com (L. Wang)

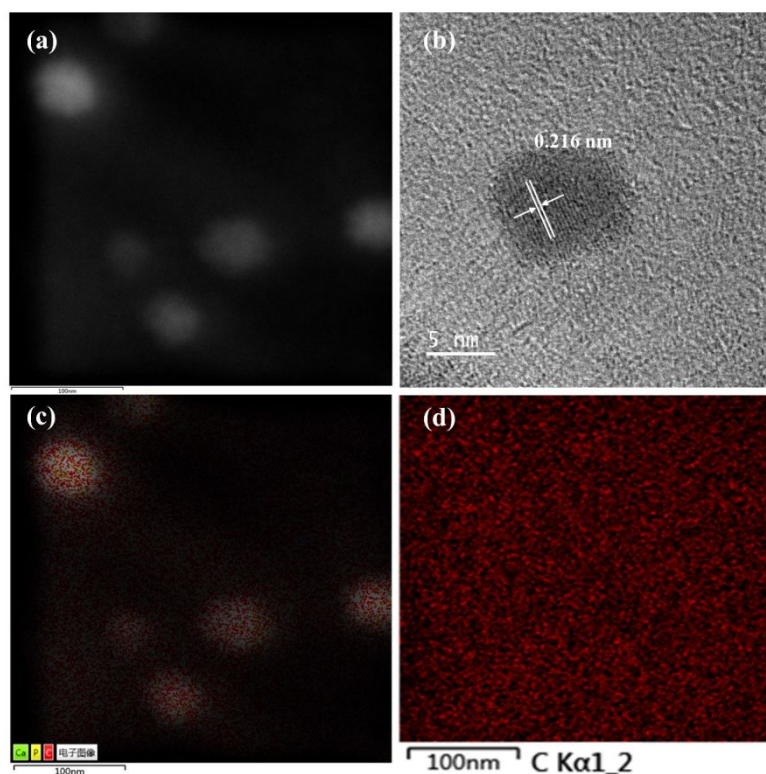

**Fig S1.** The HRTEM (a, b) and element mapping images (c, d) of pure CQDs prepared by thermal treatment of polyethylene glycol at 180 °C for 6 h.

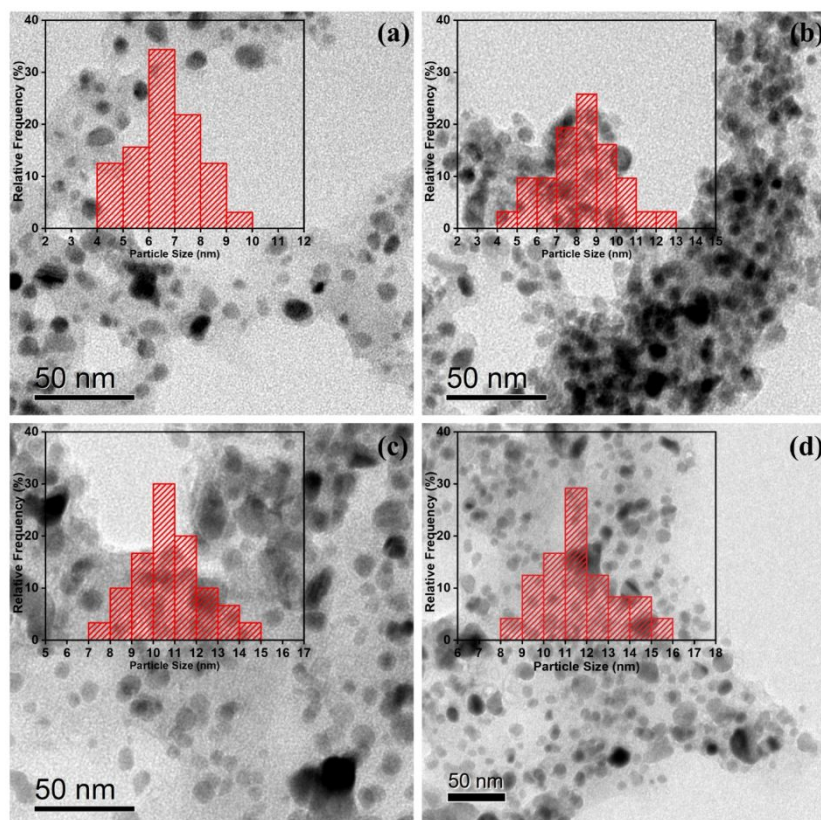

**Figure S2.** TEM images and inset the size distribution of Ni-CQDs/NCNs-450 (a), Ni-CQDs/NCNs-500 (b), Ni-CQDs/NCNs-550 (c), and Ni/NCNs-400 (d), respectively.

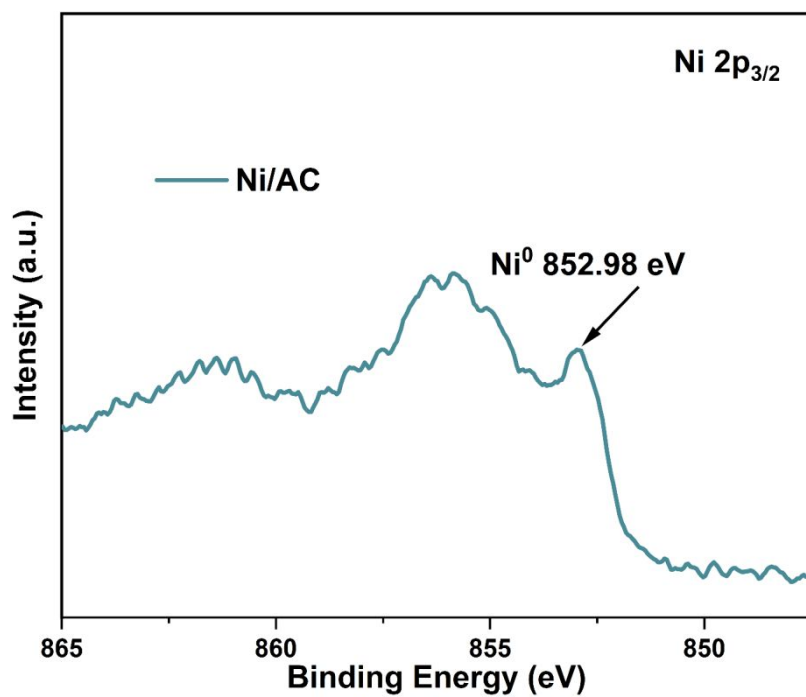

**Figure S3.** High-resolution XPS spectra of Ni 2p<sub>3/2</sub> in Ni/AC

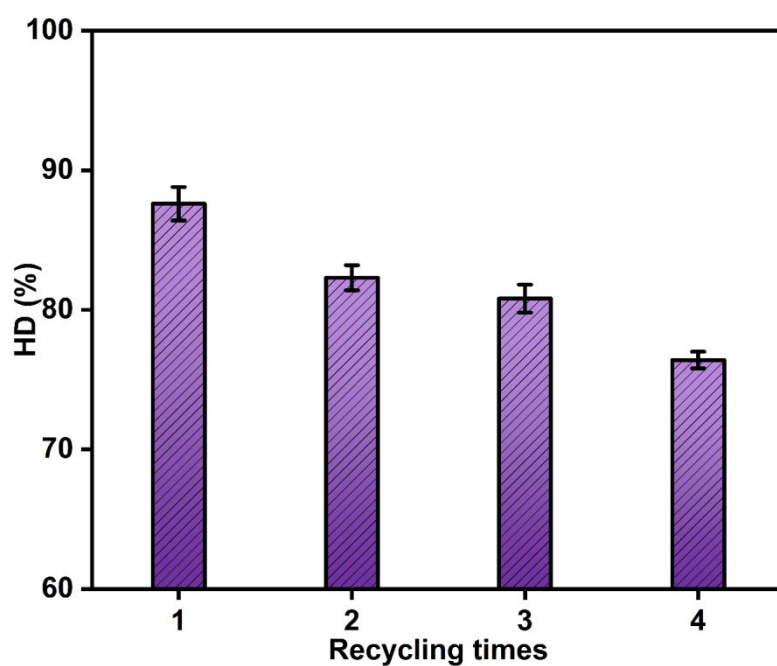

**Figure S4.** recyclability of Ni /NCNs-400.

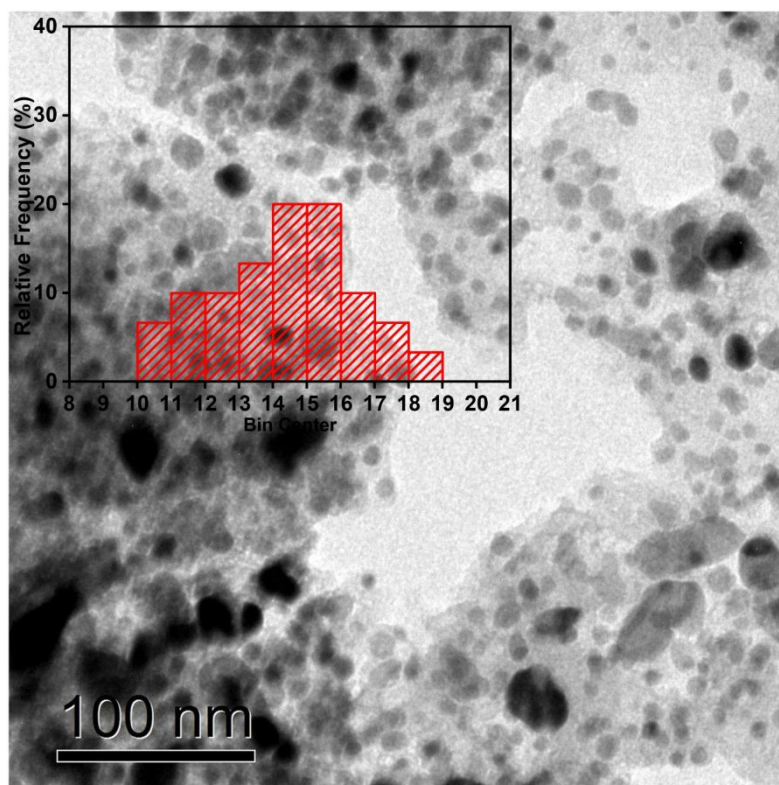

**Figure S5.** TEM image of used Ni /NCNs-400 after four runs.

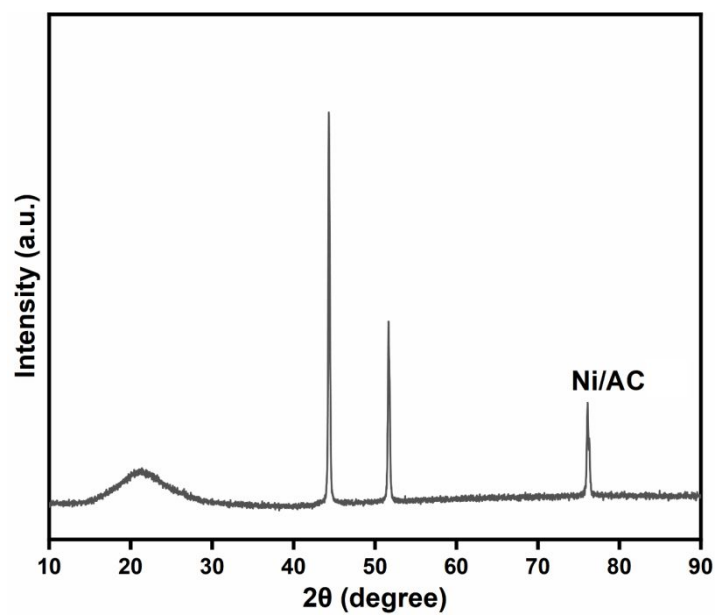

**Figure S6.** XRD pattern of Ni/AC

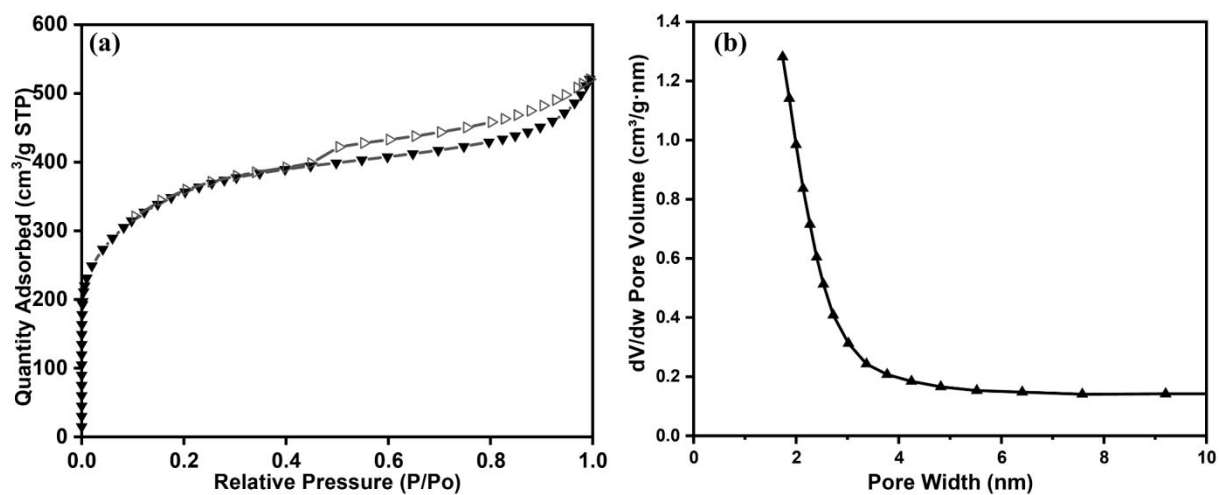

**Figure S7.** (a) Nitrogen adsorption isotherms, (b) pore distribution of Ni/AC

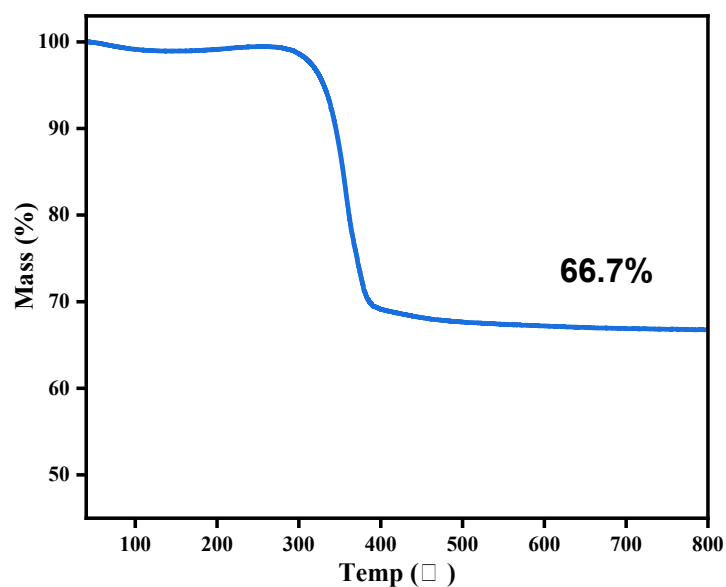

**Figure S8.** TGA curve (Air atmosphere, from room temperature to 800 °C) of Ni/AC

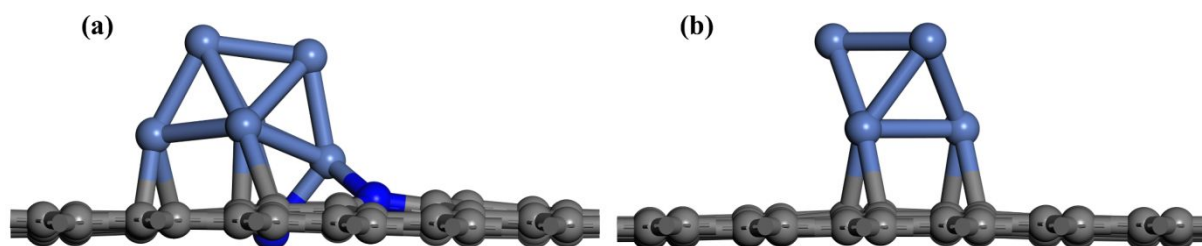

**Figure S9.** Optimized structures of Ni<sub>6</sub> adsorbed on the NC (a) and C (b) surfaces (side view).



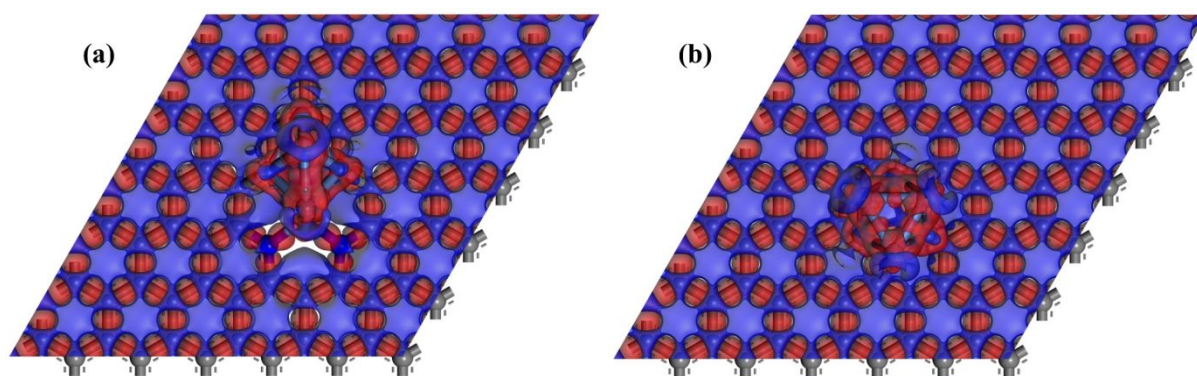

**Figure S10.** Charge density difference stereograms (top view) of (a) Ni<sub>6</sub>/NC and (b) Ni<sub>6</sub>/C.

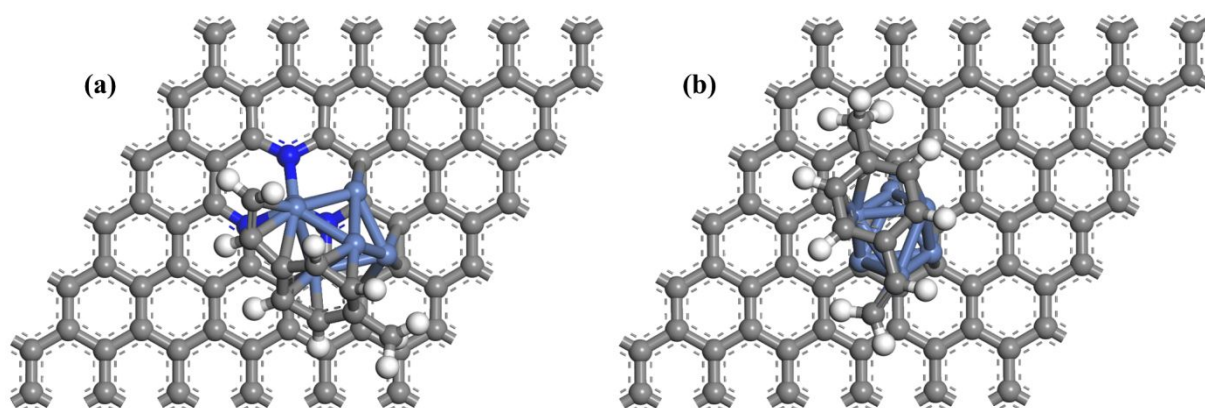

**Figure S11.** Optimized structures of 4-methylphenylene adsorbed on the Ni<sub>6</sub>/NC (a) and Ni<sub>6</sub>/C (b) surfaces (top view).

**Table S1.** Surface element content of materials

| Catalyst         | C     | Ni   | O    | N     |
|------------------|-------|------|------|-------|
| Ni-CQDs/NCNs-400 | 67.98 | 5.45 | 7.51 | 19.06 |
| Ni-CQDs/NCNs-450 | 67.90 | 5.90 | 7.39 | 18.82 |
| Ni-CQDs/NCNs-500 | 68.58 | 5.53 | 7.40 | 18.49 |
| Ni-CQDs/NCNs-550 | 71.97 | 5.23 | 5.52 | 17.29 |

**Table S2.** Ni element content of PR and HPR

| Ni element content C <sub>x</sub> (ppm) |        |
|-----------------------------------------|--------|
| PR                                      | 0.0407 |
| HPR                                     | 0.0493 |

Detected by ICP-MS.
